# Supplementary material for: Differential plasma exosomal long non-coding RNAs expression profiles and their emerging role in E-cigarette users, cigarette, waterpipe, and dual smokers
Source: PubMed Central journal article supplement (PMC7723270; doi:10.1371/journal.pone.0243065), 2020-12-08
Supplement: pone.0243065.s001.pdf [file pone.0243065.s001.pdf]

## **Supplementary Figures**

**Differential plasma exosomal long non-coding RNAs expression profiles and their emerging role in E-cig users, cigarette, waterpipe, and dual smokers**

Gagandeep Kaur, Kameshwar Singh, Krishna P. Maremanda,  
Dongmei Li, Hitendra S. Chand and Irfan Rahman

Figure S1 A-B (i)

A. Biological Pathways

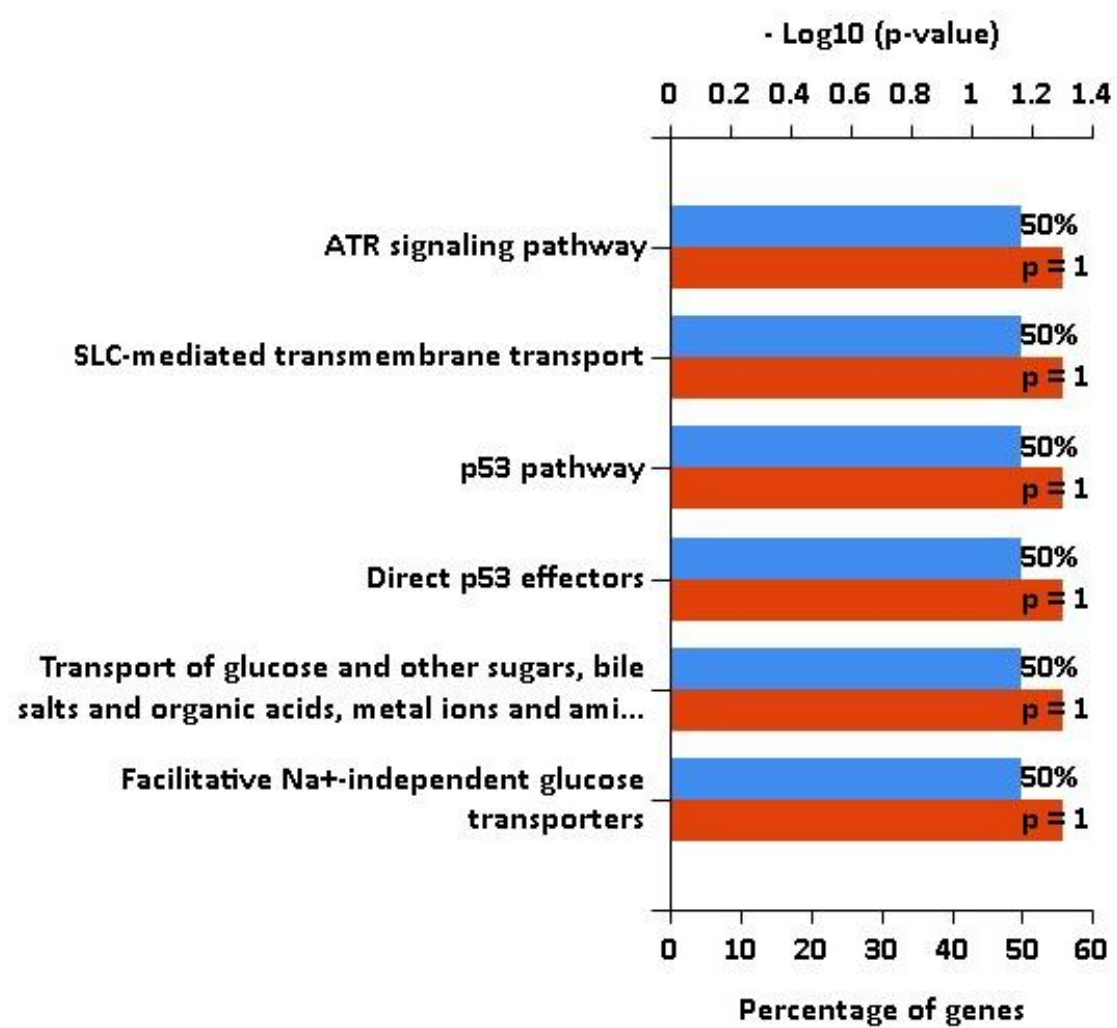

B. Site of Expression

(i) E-cig vs NS

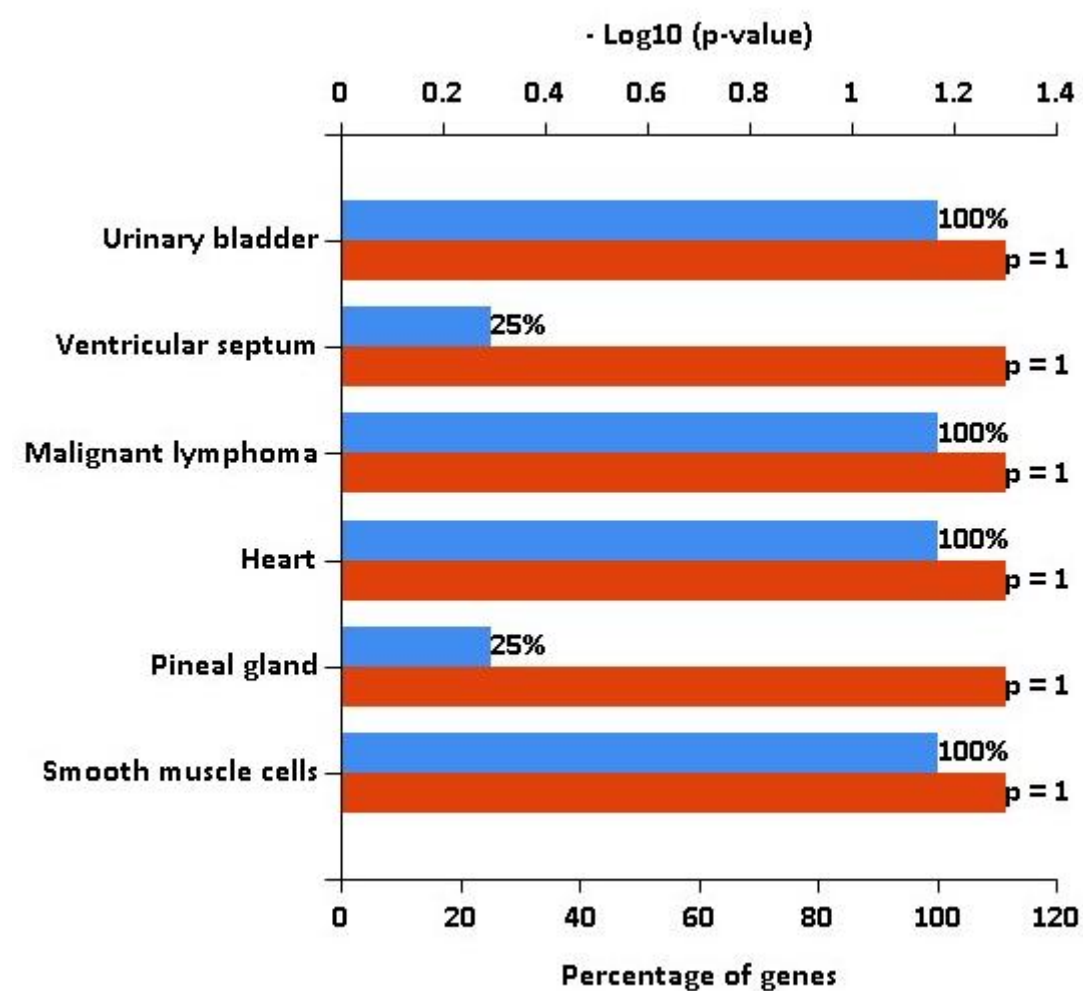

Percentage of genes  
p-Value  
p-Value ≤ 0.05 of the reference

Figure S1 A-B (ii)

A. Biological Pathways

(ii) WP vs NS

B. Site of Expression

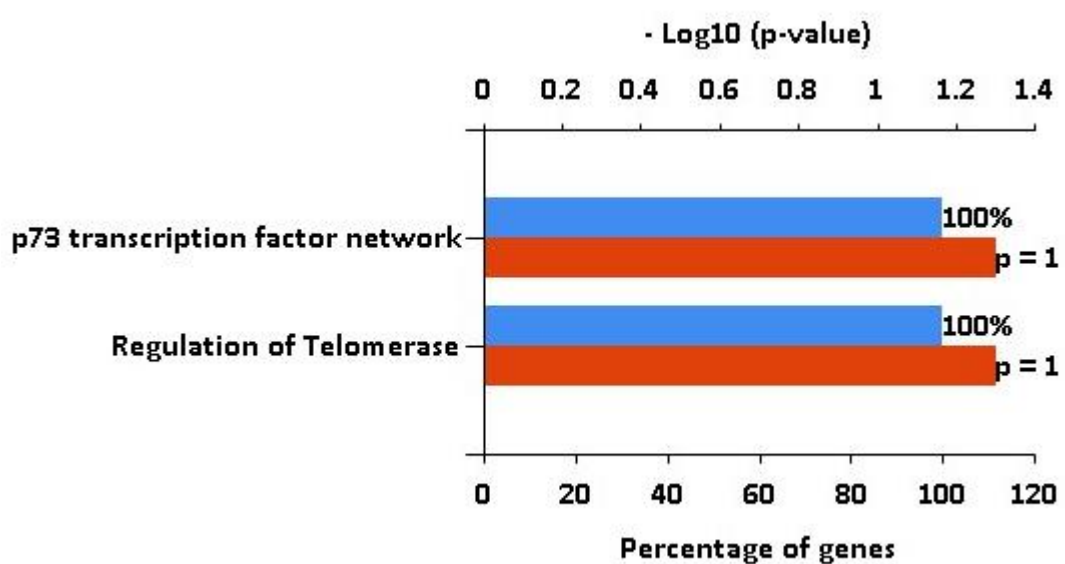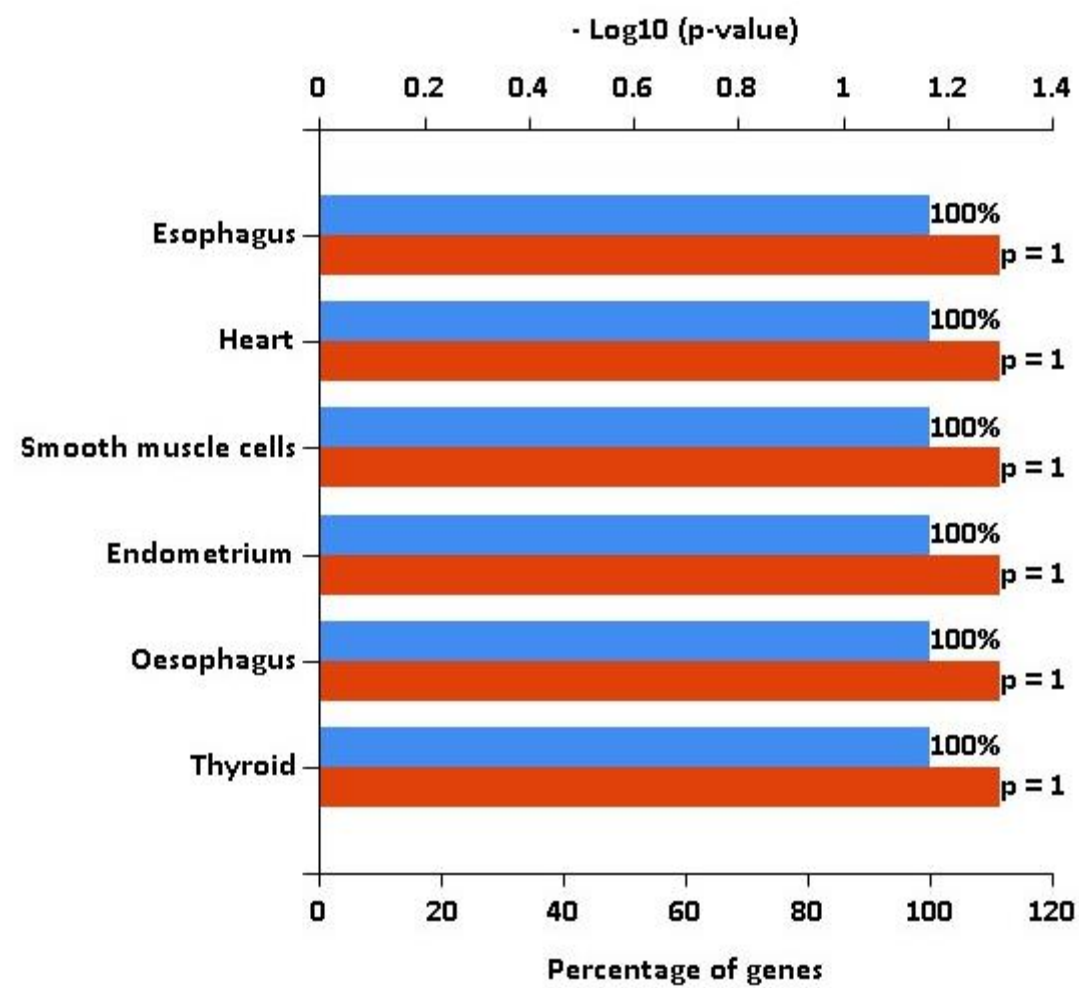

■ Percentage of genes  
■ p-Value  
■ p-Value <= 0.05 of the reference

Figure S1 A-B (iii)

A. Biological Pathways

(iii) CSWP vs NS

B. Site of Expression

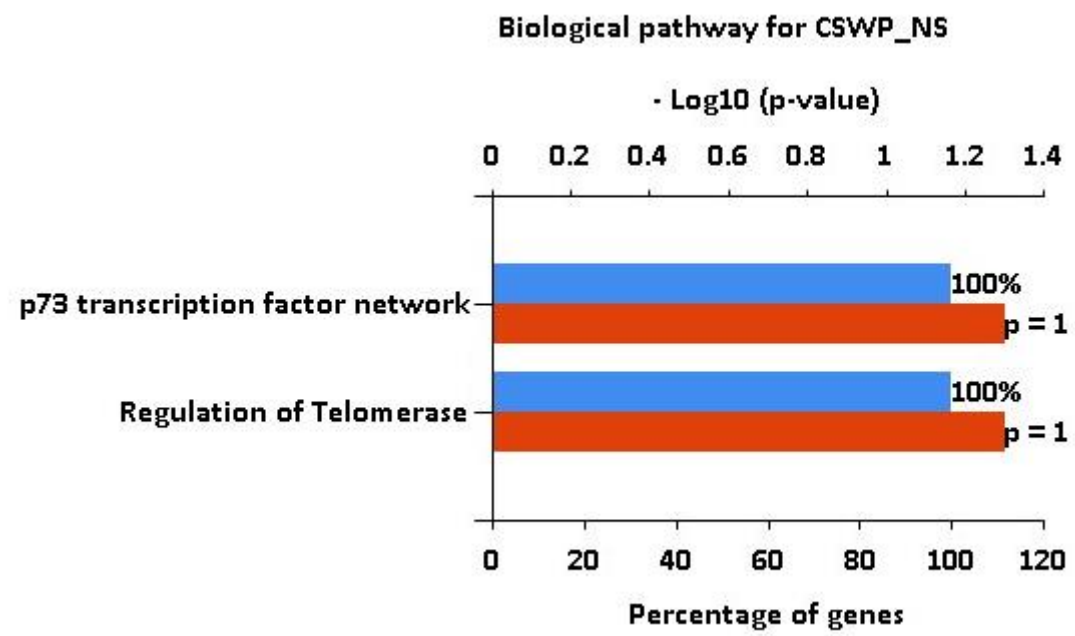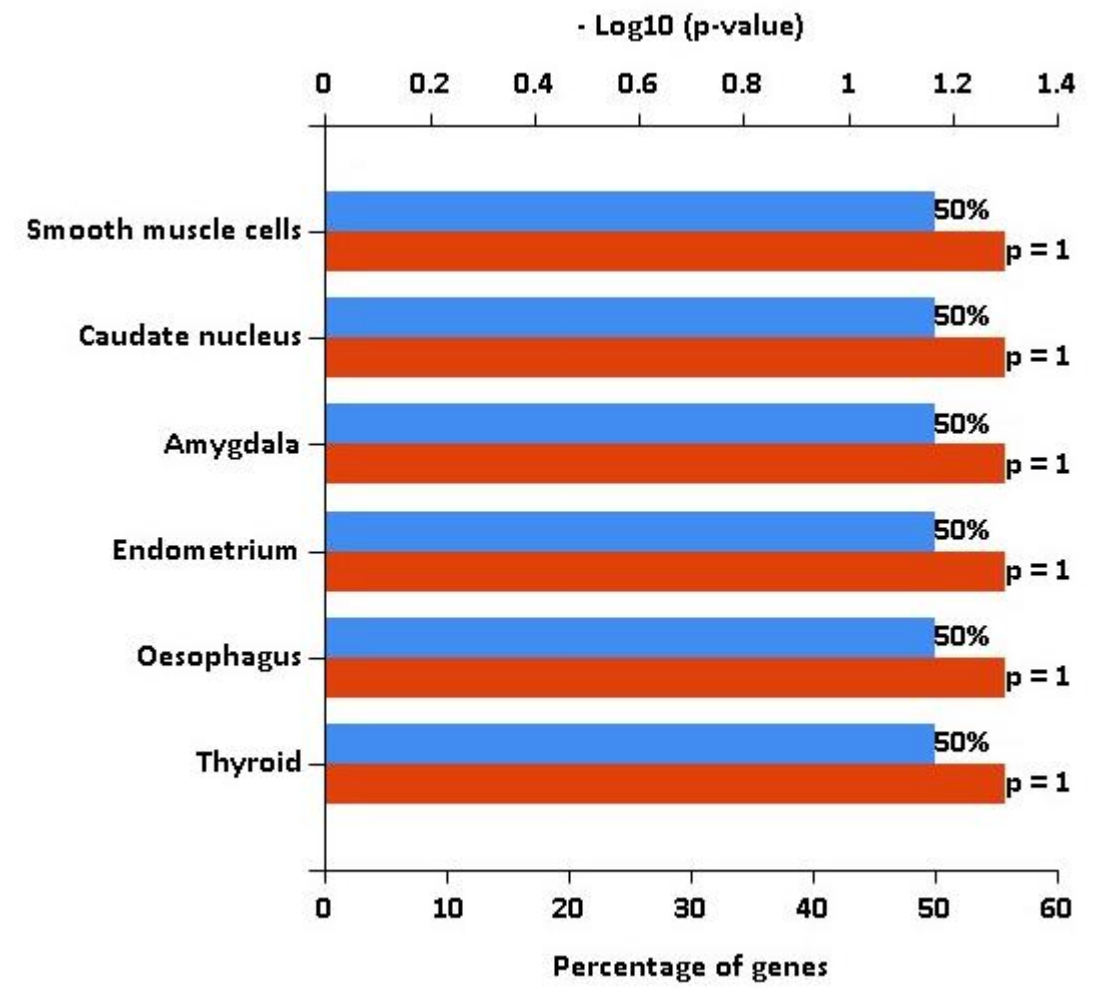

■ Percentage of genes  
■ p-Value  
■ p-Value  $\leq 0.05$  of the reference
